# Supplementary material for: A generalized strategy for the ultrafast encapsulation of metal oxide nanoclusters into zeolites
Source: Royal Society of Chemistry journal article supplement (doi:10.1039/d3re00714f), 2024-01-01
Supplement: d3re00714f1.pdf [file d3re00714f1.pdf]

## **Supporting information**

### **A Generalized Strategy for the Ultrafast Encapsulation of Metal Oxide Nanoclusters into Zeolites**

Tao Yu, Yundong Wang, Jianhong Xu\* and Zhendong Liu\*

The State Key Laboratory of Chemical Engineering, Department of Chemical  
Engineering, Tsinghua University, Haidian District, Beijing 100084

Correspondence: [xujianhong@tsinghua.edu.cn](mailto:xujianhong@tsinghua.edu.cn) (J.X.)

[liuzd@tsinghua.edu.cn](mailto:liuzd@tsinghua.edu.cn) (Z.L.)

# Table of Content

|                                                                                                                                                         |   |
|---------------------------------------------------------------------------------------------------------------------------------------------------------|---|
| Figure S1   XRD patterns of the silicalite-1 synthesized at 210 °C for different times.....                                                             | 3 |
| Figure S2   UV-visible spectrum of CuO@silicalite-1.....                                                                                                | 3 |
| Figure S3   The elements distribution in CoO@silicalite-1. ....                                                                                         | 4 |
| Figure S4   Evolution of crystallinity of CuO@silicalite-1 synthesized at different temperatures over times.....                                        | 4 |
| Figure S5   Evolution of crystallinity of CuO@silicalite-1 synthesized after different aging periods.....                                               | 5 |
| Figure S6   XRD patterns of the CuO@silicalite-1 synthesized at 210 °C for 5 min with different TPA <sup>+</sup> /Si ratio. ....                        | 5 |
| Figure S7   XRD patterns of the CuO@silicalite-1 synthesized at 210 °C for 5 min with different EDA/Si ratio. ....                                      | 6 |
| Figure S8   Catalytic performance of the CuO@silicalite-1 zeolites synthesized via impregnation in the dehydrogenation of ethanol to acetaldehyde. .... | 6 |
| Figure S9   XRD patterns of the CuO@silicalite-1 synthesized via continuous-flow encapsulation.....                                                     | 7 |

## Supplementary Figures

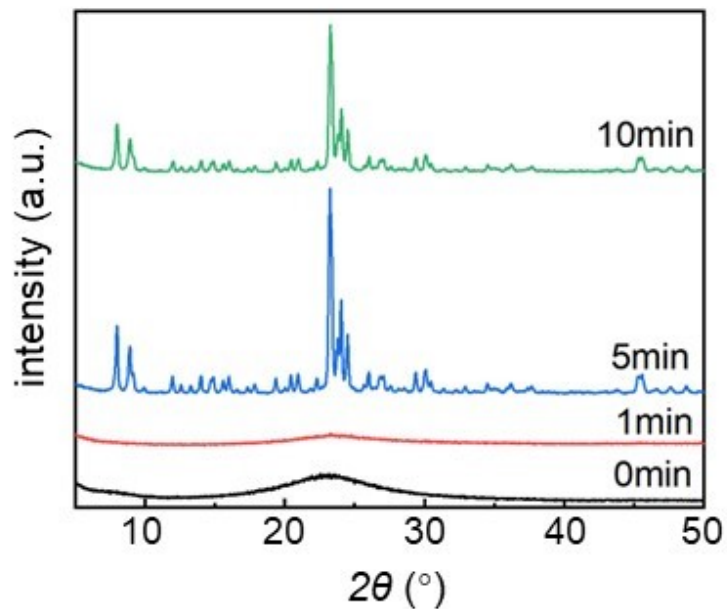

Figure S1 | XRD patterns of the silicalite-1 synthesized at 210 °C for different times.

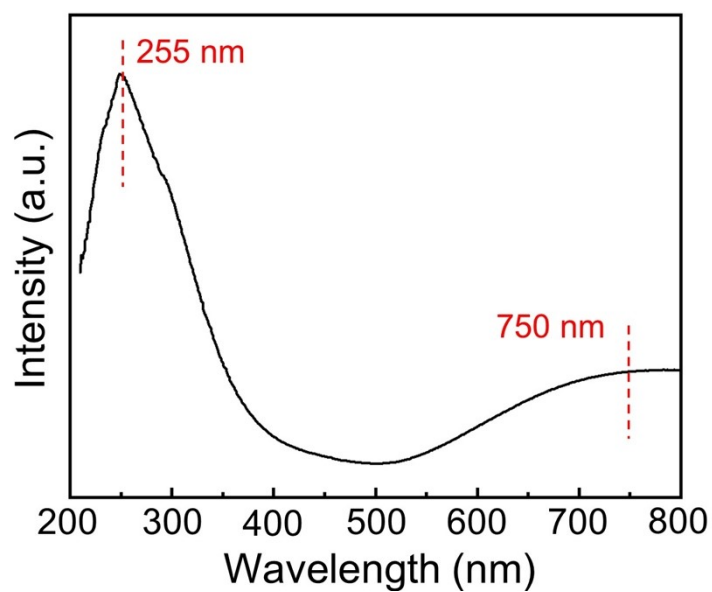

Figure S2 | UV-visible spectrum of CuO@silicalite-1.

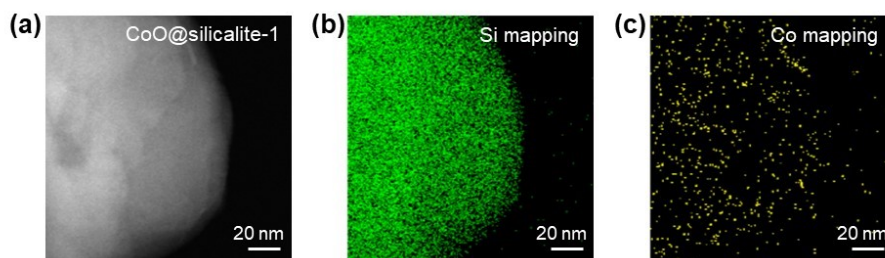

**Figure S3 | The elements distribution in CoO@silicalite-1.**

(a) HAADF-STEM image of CoO@silicalite-1. (b) and (c) EDX mapping of Si element and Co element, respectively.

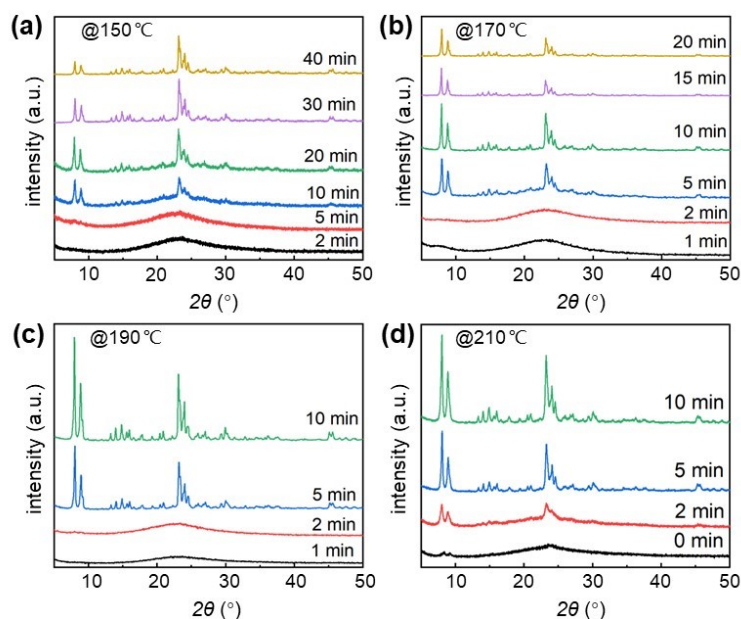

**Figure S4 | Evolution of crystallinity of CuO@silicalite-1 synthesized at different temperatures over times.**

(a) to (d) XRD patterns of samples synthesized over different times under 150 °C, 170 °C, 190 °C and 210 °C, respectively. (The synthesis precursor had the following molar composition: 5 NaOH: 30 SiO<sub>2</sub>: 2 TPAOH: 690 H<sub>2</sub>O: 1.2 Cu(NO<sub>3</sub>)<sub>2</sub>: 3.75 EDA.)

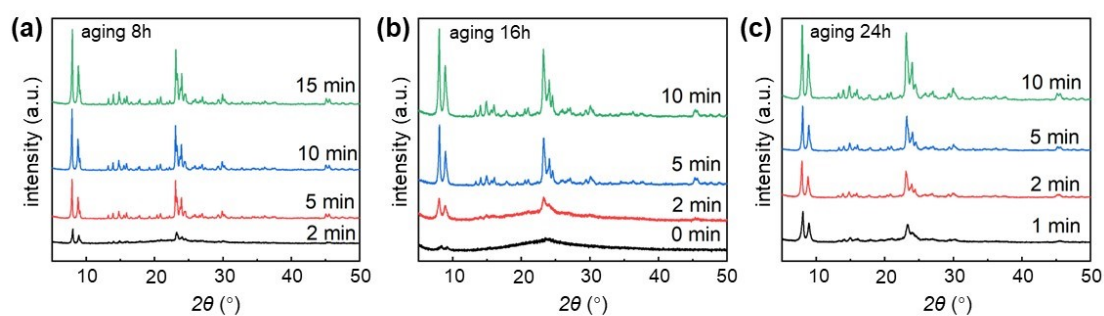

**Figure S5 | Evolution of crystallinity of CuO@silicalite-1 synthesized after different aging periods.**

(a) to (c) XRD patterns of samples synthesized after aging for 8 h, 16 h and 24 h, respectively. (The synthesis precursor had the following molar composition: 5 NaOH: 30 SiO<sub>2</sub>: 2 TPAOH: 690 H<sub>2</sub>O: 1.2 Cu(NO<sub>3</sub>)<sub>2</sub>: 3.75 EDA.)

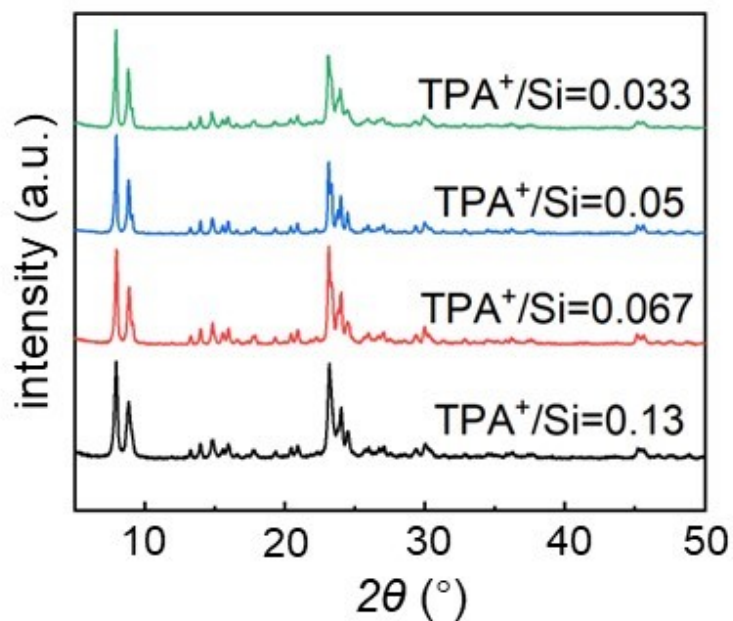

**Figure S6 | XRD patterns of the CuO@silicalite-1 synthesized at 210 °C for 5 min with different TPA<sup>+</sup>/Si ratio.**

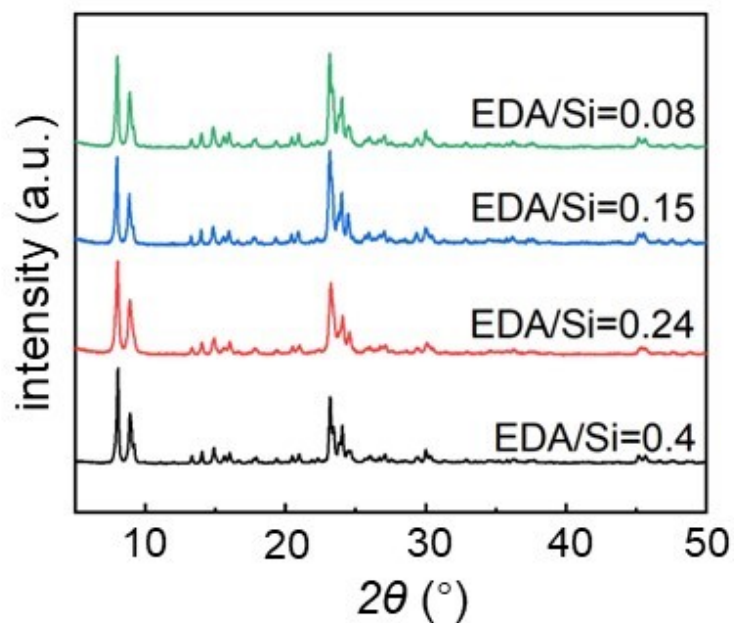

**Figure S7 | XRD patterns of the CuO@silicalite-1 synthesized at 210 °C for 5 min with different EDA/Si ratio.**

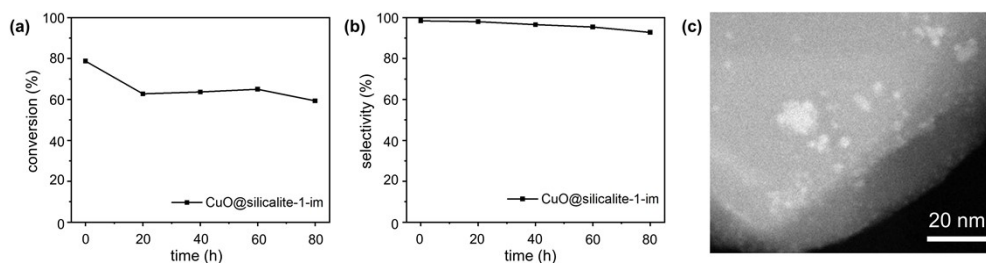

**Figure S8 | Catalytic performance of the CuO@silicalite-1 zeolites synthesized via impregnation in the dehydrogenation of ethanol to acetaldehyde.**

(a) and (b) Conversion and selectivity of the sample in the reaction, respectively. (c) HAADF-STEM image of CuO@silicalite-1 synthesized via impregnation after 80 h of catalytic reaction. The CuO content in the catalyst was 2.4 wt%.

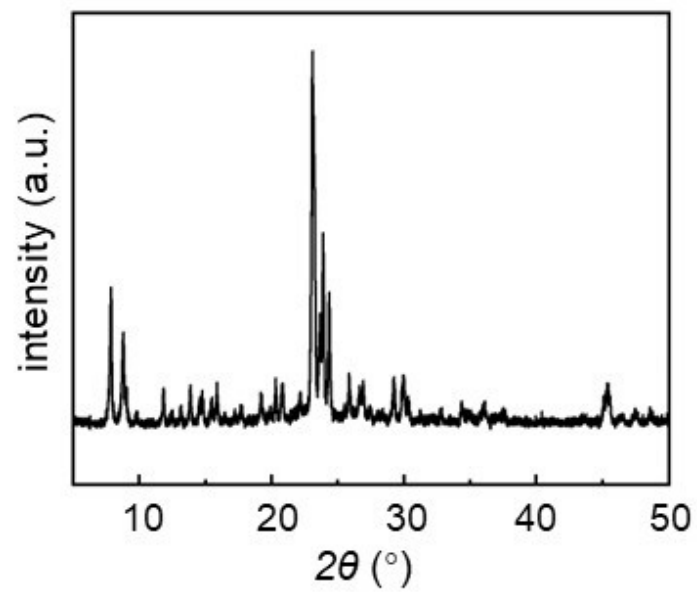

**Figure S9 | XRD patterns of the CuO@silicalite-1 synthesized via continuous-flow encapsulation.**
